# Supplementary material for: Local nucleosome dynamics and eviction following a double-strand break are reversible by NHEJ-mediated repair in the absence of DNA replication
Source: HighWire-hosted journal article supplement (doi:10.1101/gr.271155.120), 2021-04-02

**1D Nucleosome Positional Density (ChrIV)**

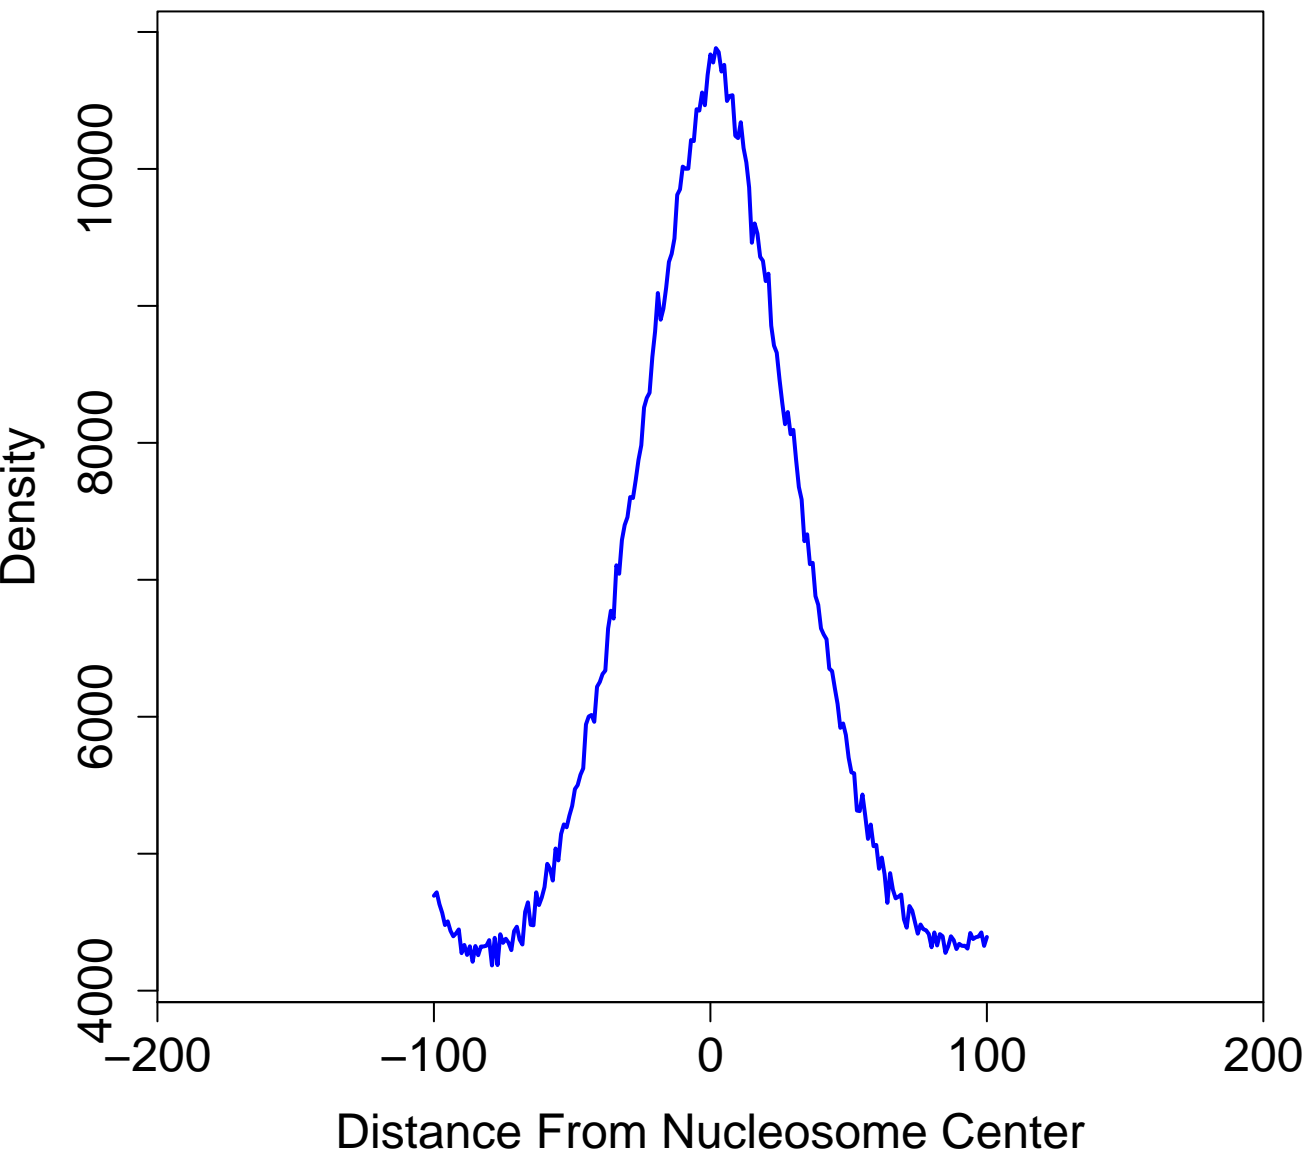

**1D Nucleosomal Fragment Size Density (ChrIV)**

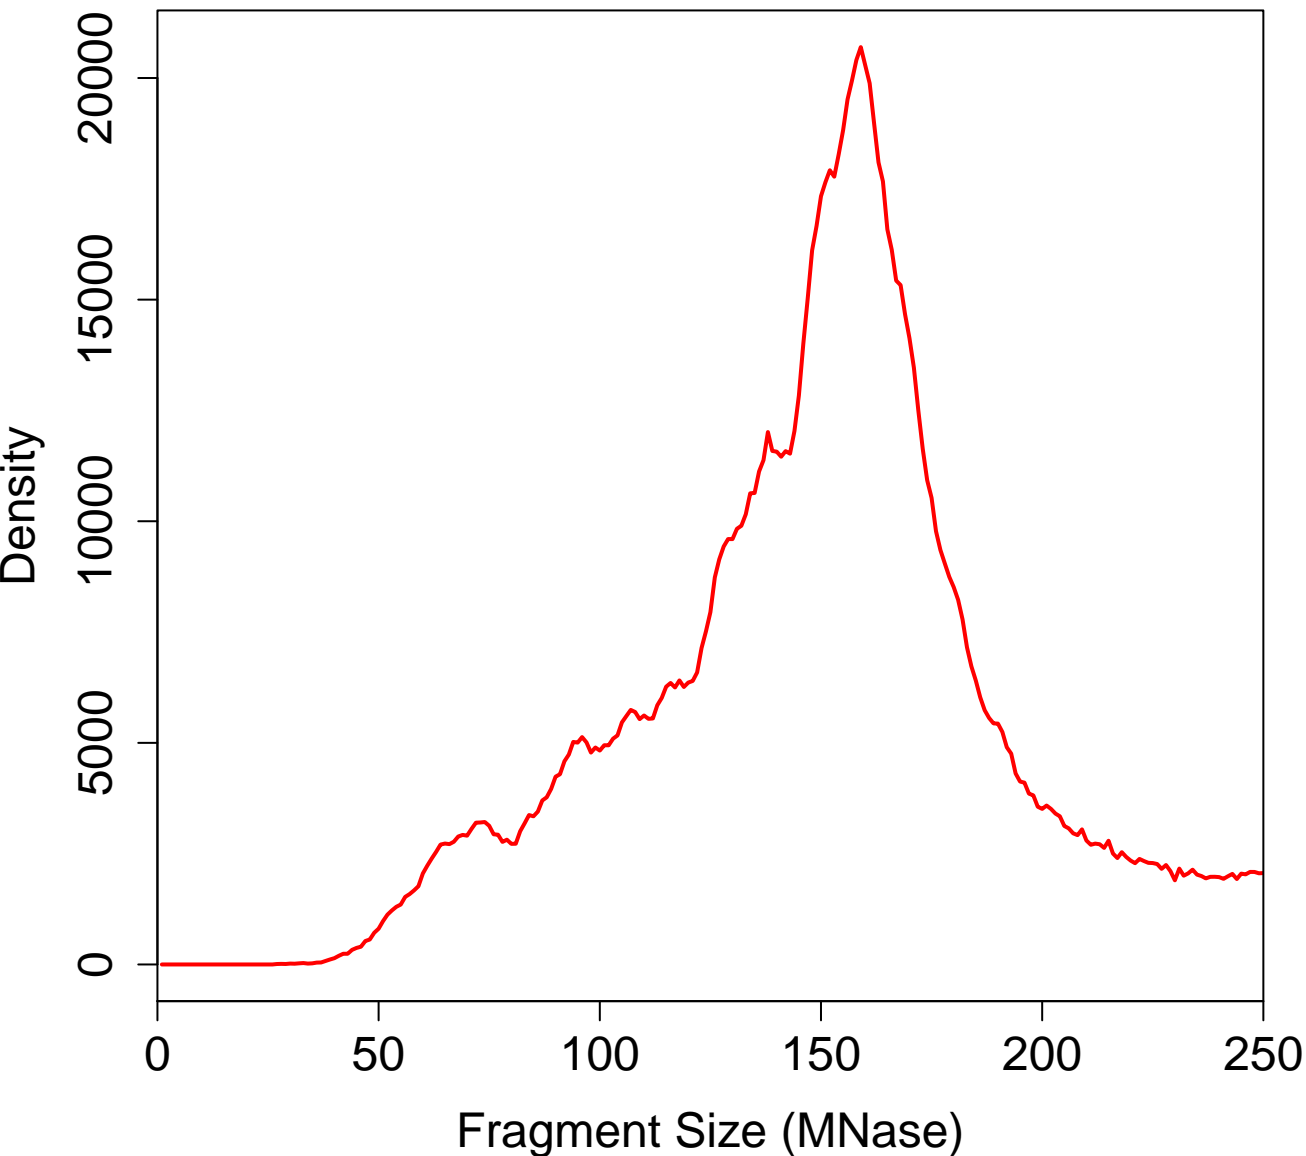

**1D Nucleosome Positional Density (ChrIV)**

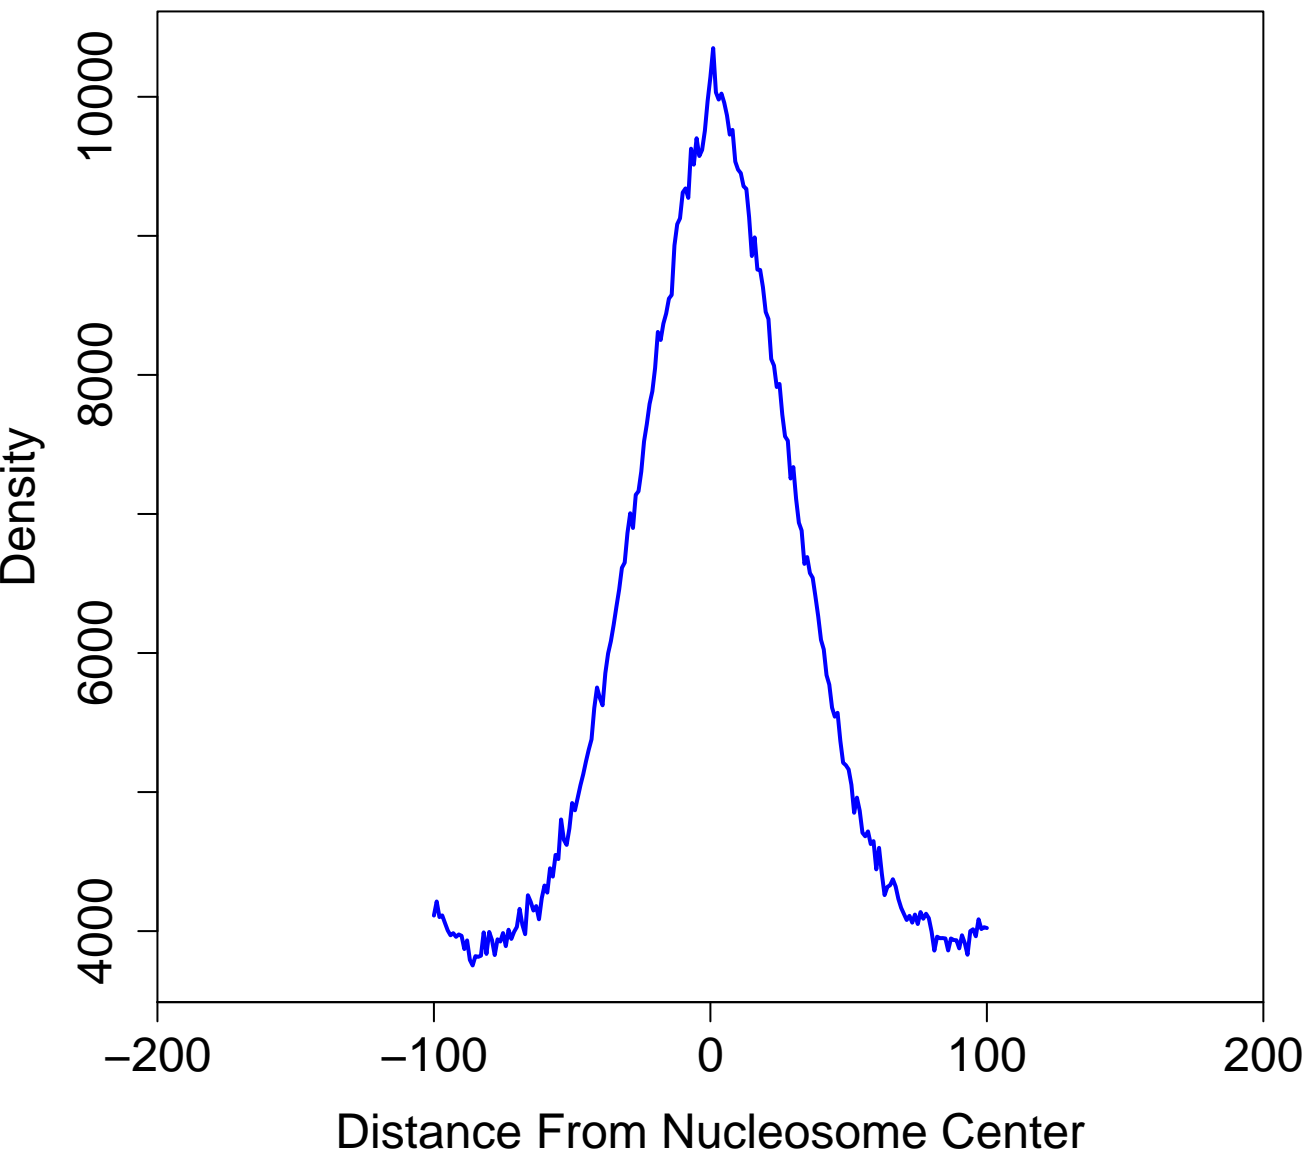

1D Nucleosomal Fragment Size Density (ChrIV)

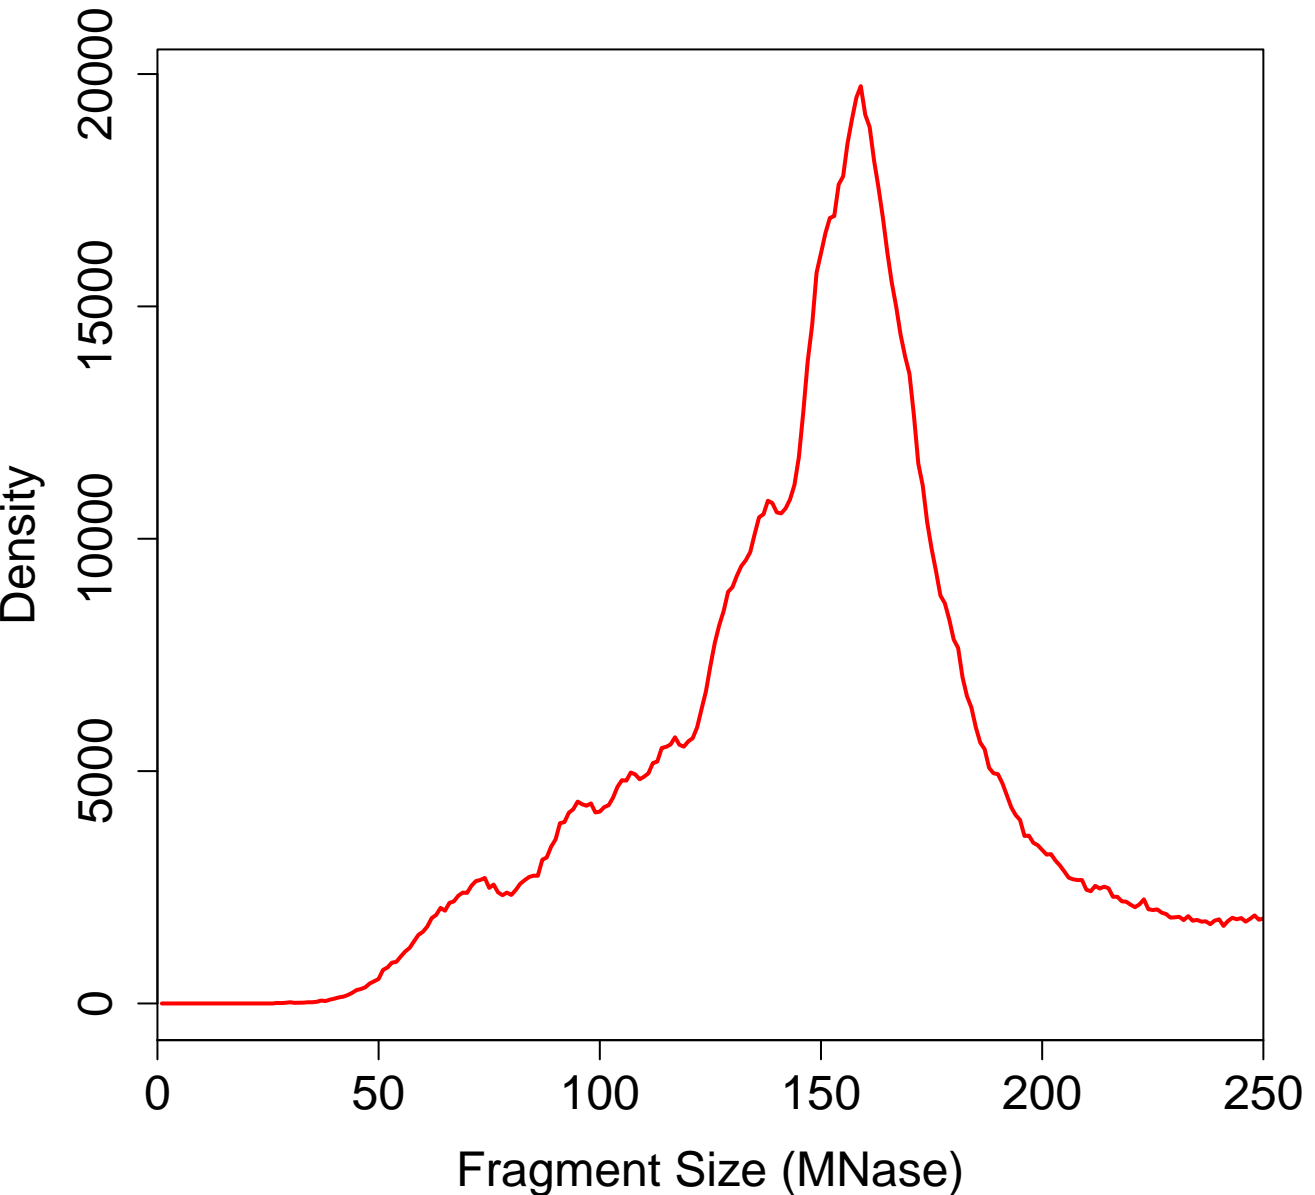

**1D Nucleosome Positional Density (ChrIV)**

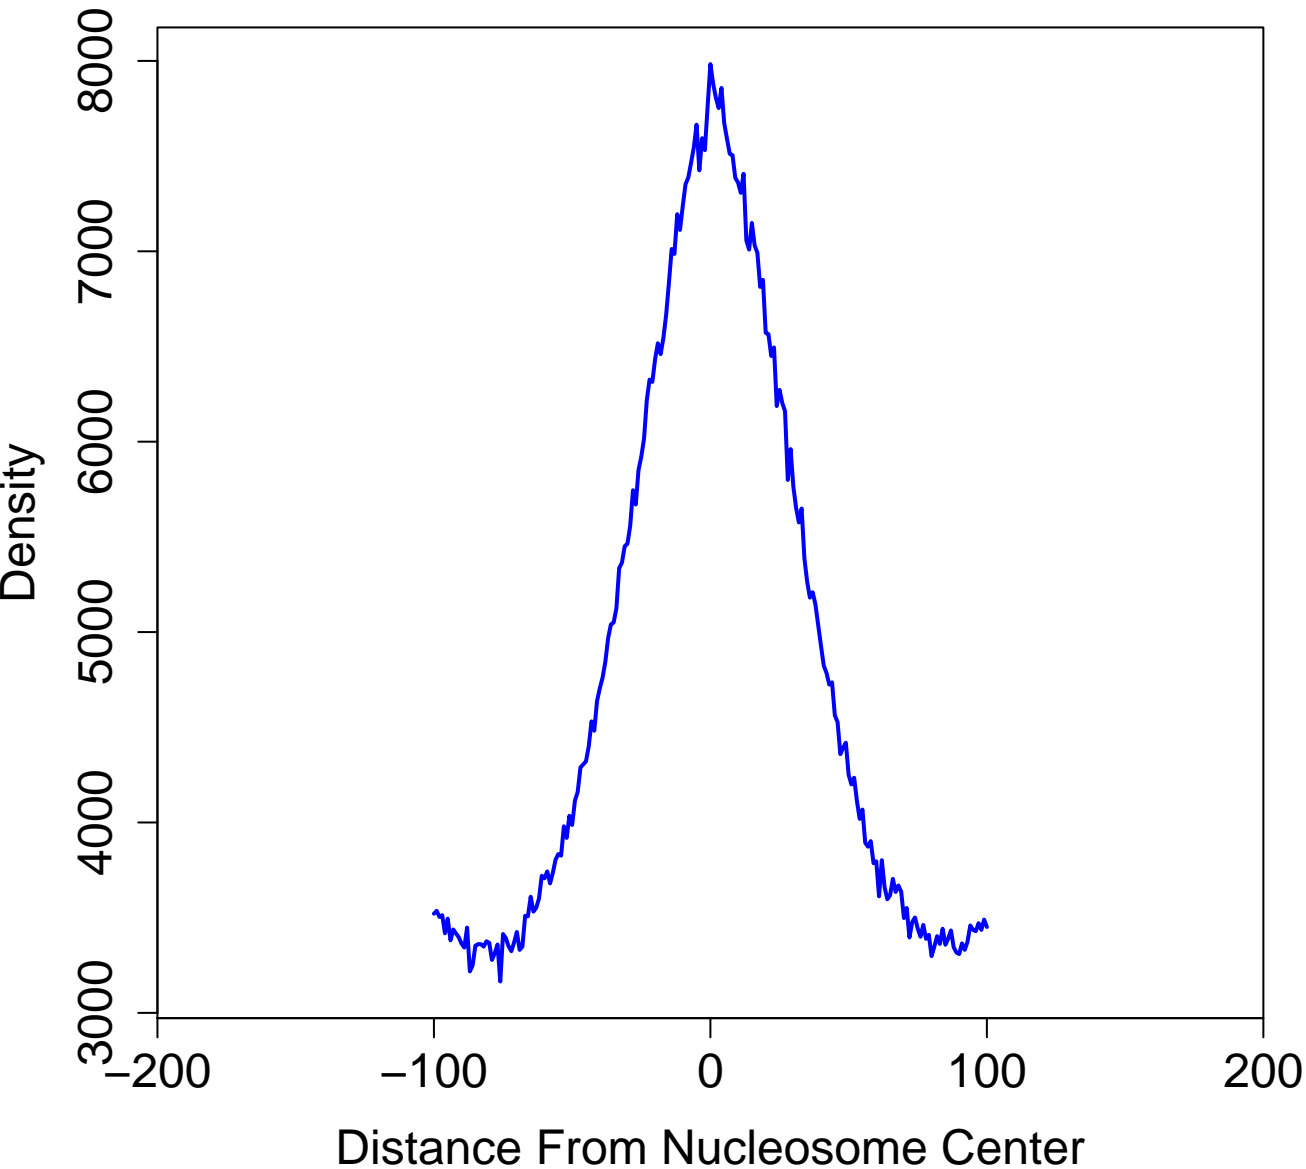

1D Nucleosomal Fragment Size Density (ChrIV)

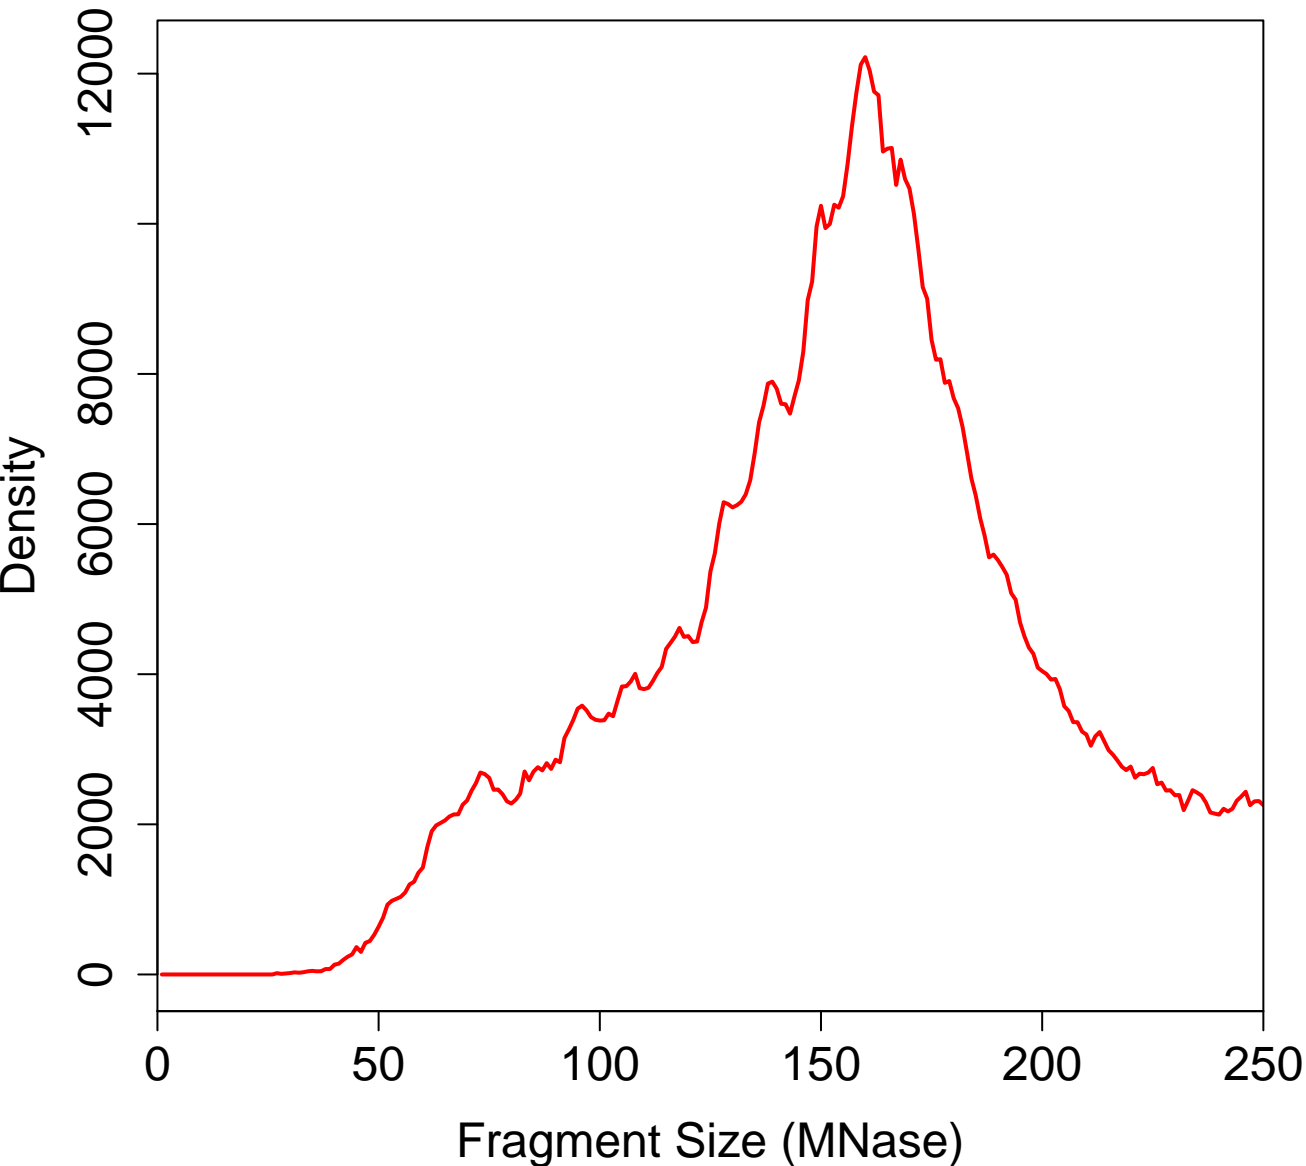

**1D Nucleosome Positional Density (ChrIV)**

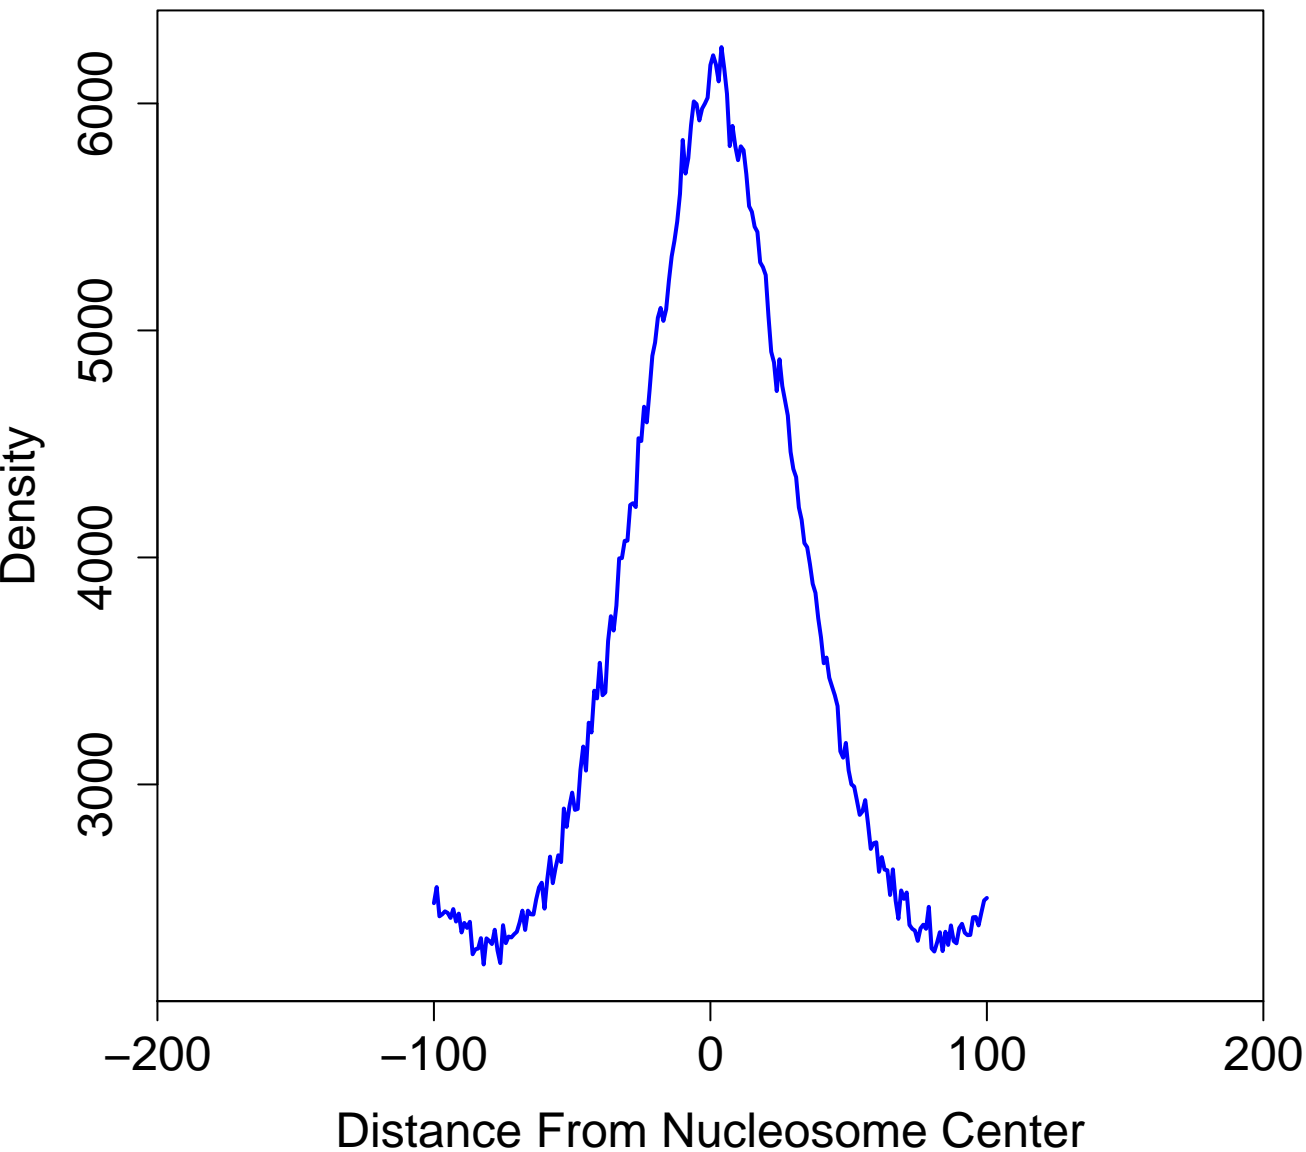

1D Nucleosomal Fragment Size Density (ChrIV)

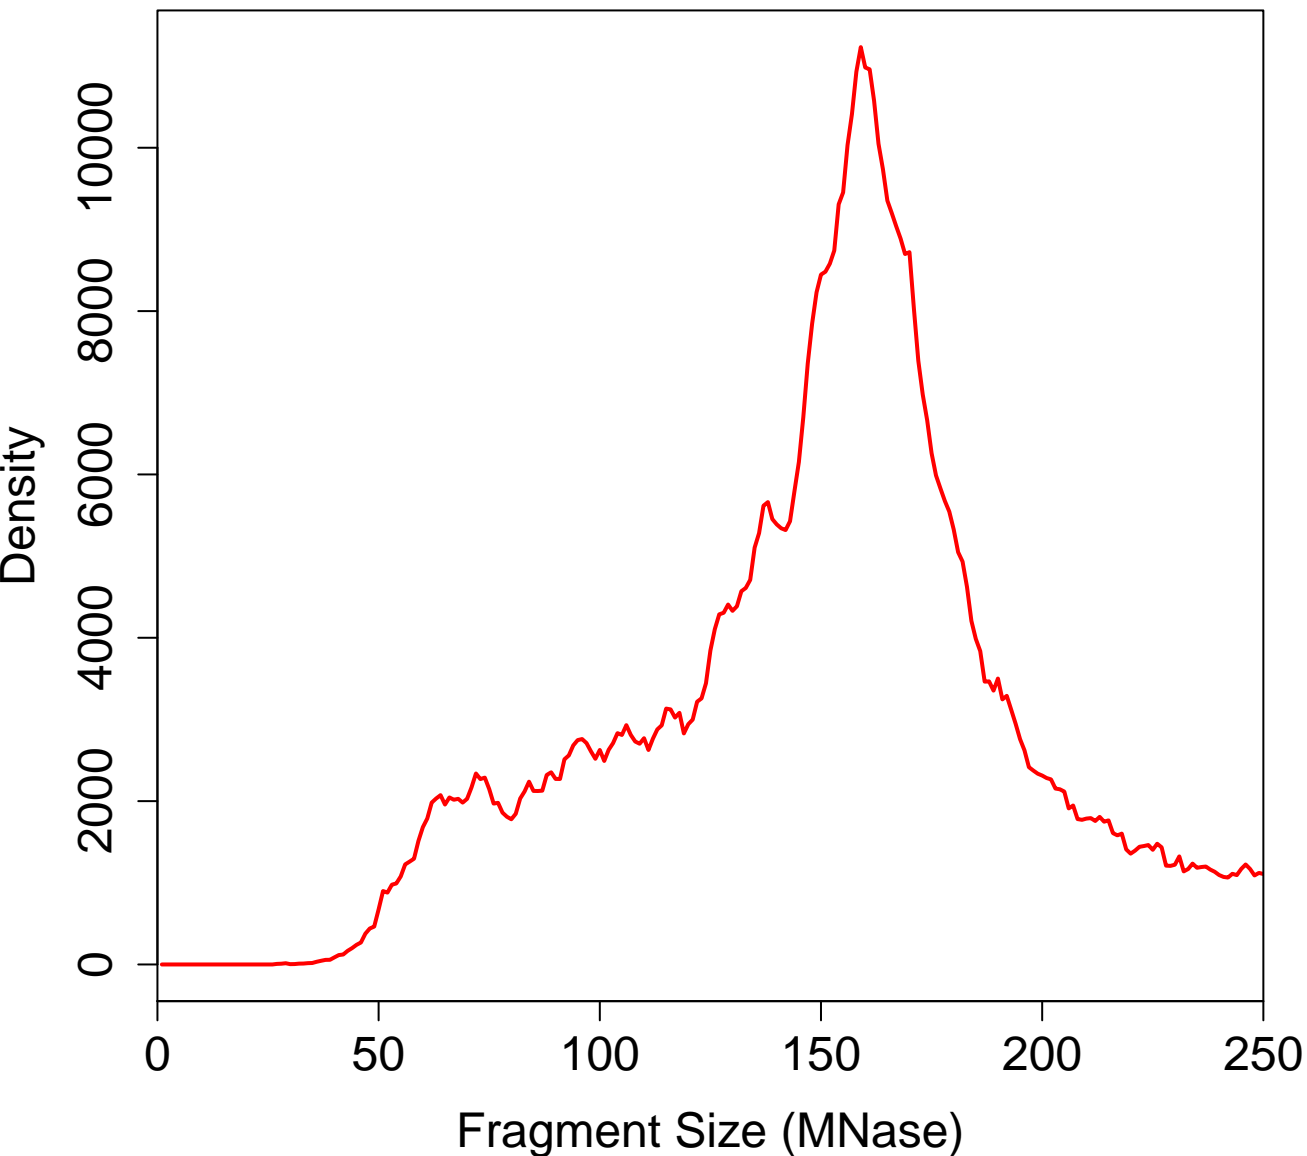



**1D Nucleosome Positional Density (ChrIV)**

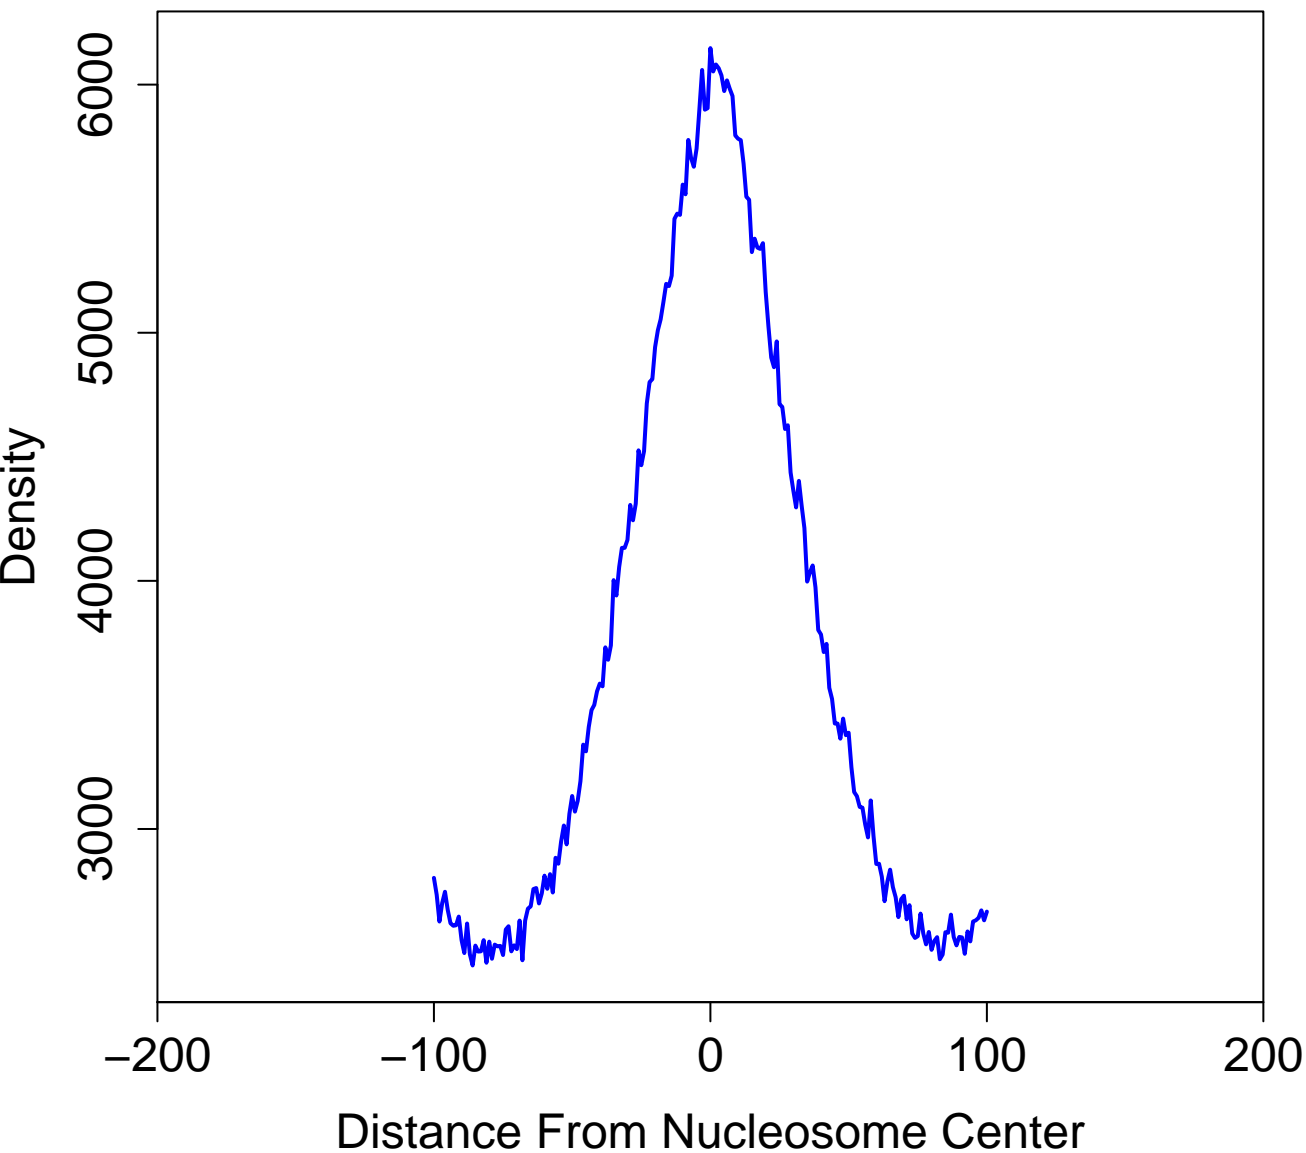

1D Nucleosomal Fragment Size Density (ChrIV)

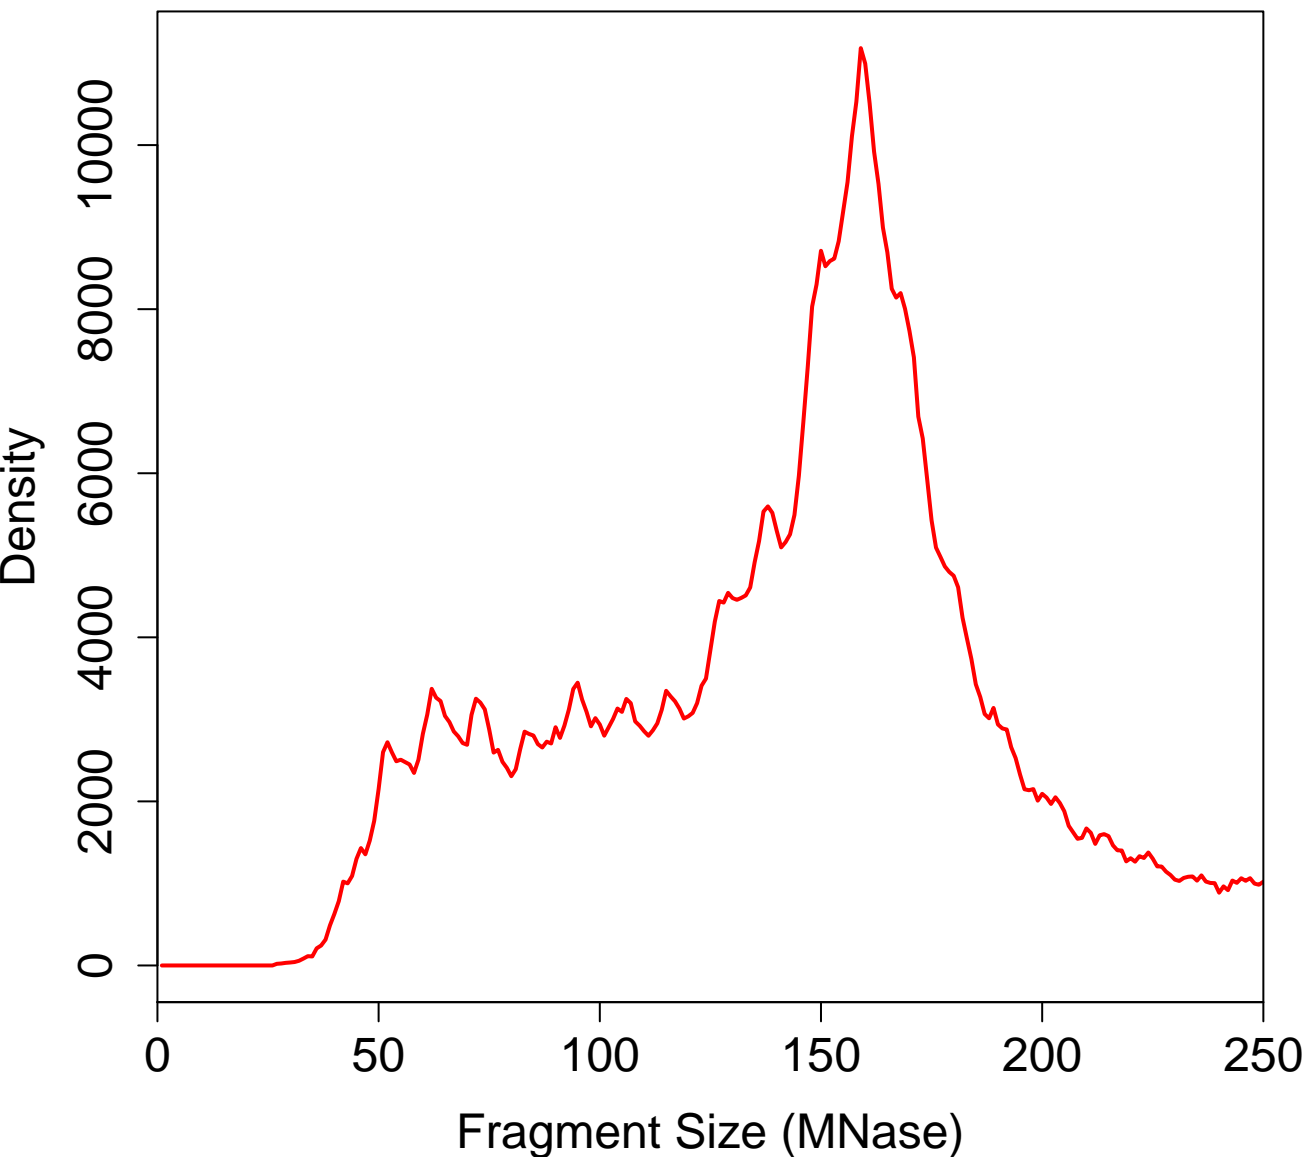

Supplement: Supplemental_Code.zip [file Rplots.pdf › tripuraneni_dsb_2021-update-bam-reading/Rplots.pdf]
