# Supplementary material for: Local nucleosome dynamics and eviction following a double-strand break are reversible by NHEJ-mediated repair in the absence of DNA replication
Source: HighWire-hosted journal article supplement (doi:10.1101/gr.271155.120), 2021-04-02
Supplement: Supplemental_Table_S2.xlsx [file Supplemental_Table_S2.xlsx]

## Sheet: all.runs.summary
Run	Replicate	Chr2	Group	Isolate	Sample	Library	Read.Length	Coverage	Entropy.Correlation	Coverage.Correlation	Num.Fragments	Genome.Length
SRR13397245	1	1	WT	WT Pre-Induction Replicate 1	DM1129	chr2_pho5matindel	26	100.426	0.901195	0.989473	1570933	813416
SRR13397244	1	1	WT	WT 15 Min Replicate 1	DM1130	chr2_pho5matindel	26	91.9374	0.941058	0.996705	1438141	813416
SRR13397213	1	1	WT	WT 30 Min Replicate 1	DM1131	chr2_pho5matindel	26	91.8652	0.900383	0.996139	1437012	813416
SRR13397202	1	1	WT	WT 60 Min Replicate 1	DM1132	chr2_pho5matindel	26	94.6849	0.927963	0.992887	1481119	813416
SRR13397191	1	1	WT	WT 90 Min Replicate 1	DM1133	chr2_pho5matindel	26	79.4861	0.965965	0.998141	1243371	813416
SRR13397180	1	1	WT	WT 120 Min Replicate 1	DM1134	chr2_pho5matindel	26	95.4588	0.888208	0.98404	1493225	813416
SRR13397289	1	1	YKU	YKU70- Pre-Induction Replicate 1	DM1135	chr2_pho5matindel	26	104.94	0.802715	0.979087	1641532	813416
SRR13397278	1	1	YKU	YKU70- 15 Min Replicate 1	DM1136	chr2_pho5matindel	26	77.098	0.889946	0.985015	1206015	813416
SRR13397267	1	1	YKU	YKU70- 30 Min Replicate 1	DM1137	chr2_pho5matindel	26	85.6104	0.90767	0.99171	1339170	813416
SRR13397256	1	1	YKU	YKU70- 60 Min Replicate 1	DM1138	chr2_pho5matindel	26	73.3881	0.931357	0.99164	1147982	813416
SRR13397243	1	1	YKU	YKU70- 90 Min Replicate 1	DM1139	chr2_pho5matindel	26	72.0433	0.893183	0.990906	1126945	813416
SRR13397232	1	1	YKU	YKU70- 120 Min Replicate 1	DM1140	chr2_pho5matindel	26	72.189	0.888917	0.990603	1129224	813416
SRR13397221	1	1	MRE11	MRE11- Pre-Induction Replicate 1	DM1141	chr2_pho5matindel	26	64.1051	0.927908	0.994991	1002772	813416
SRR13397219	1	1	MRE11	MRE11- 15 Min Replicate 1	DM1142	chr2_pho5matindel	26	64.35	0.949867	0.997495	1006602	813416
SRR13397218	1	1	MRE11	MRE11- 30 Min Replicate 1	DM1143	chr2_pho5matindel	26	75.8904	0.91621	0.99714	1187125	813416
SRR13397217	1	1	MRE11	MRE11- 60 Min Replicate 1	DM1144	chr2_pho5matindel	26	70.8474	0.948147	0.997773	1108239	813416
SRR13397220	1	1	MRE11	MRE11- 90 Min Replicate 1	DM1145	chr2_pho5matindel	26	61.1923	0.954435	0.997688	957208	813416
SRR13397216	1	1	MRE11	MRE11- 120 Min Replicate 1	DM1146	chr2_pho5matindel	26	43.3837	0.897321	0.988245	678635	813416
SRR13397215	2	1	WT	WT Pre-Induction Replicate 2	DM1147	chr2_pho5matindel	26	58.1428	0.901195	0.989473	909506	813416
SRR13397214	2	1	WT	WT 15 Min Replicate 2	DM1148	chr2_pho5matindel	26	60.88	0.941058	0.996705	952323	813416
SRR13397212	2	1	WT	WT 30 Min Replicate 2	DM1149	chr2_pho5matindel	26	52.0678	0.900383	0.996139	814477	813416
SRR13397211	2	1	WT	WT 60 Min Replicate 2	DM1150	chr2_pho5matindel	26	75.1081	0.927963	0.992887	1174887	813416
SRR13397210	2	1	WT	WT 90 Min Replicate	DM1151	chr2_pho5matindel	26	60.716	0.965965	0.998141	949757	813416
SRR13397209	2	1	WT	WT 120 Min Replicate	DM1152	chr2_pho5matindel	26	72.3298	0.888208	0.98404	1131428	813416
SRR13397208	2	1	YKU	YKU70- Pre-Induction Replicate 2	DM1153	chr2_pho5matindel	26	56.283	0.802715	0.979087	880414	813416
SRR13397207	2	1	YKU	YKU70- 15 Min Replicate 2	DM1154	chr2_pho5matindel	26	57.5362	0.889946	0.985015	900017	813416
SRR13397206	2	1	YKU	YKU70- 30 Min Replicate 2	DM1155	chr2_pho5matindel	26	58.9424	0.90767	0.99171	922013	813416
SRR13397205	2	1	YKU	YKU70- 60 Min Replicate 2	DM1156	chr2_pho5matindel	26	67.3245	0.931357	0.99164	1053131	813416
SRR13397204	2	1	YKU	YKU70- 90 Min Replicate	DM1157	chr2_pho5matindel	26	53.8805	0.893183	0.990906	842832	813416
SRR13397203	2	1	YKU	YKU70- 120 Min Replicate	DM1158	chr2_pho5matindel	26	51.1932	0.888917	0.990603	800796	813416
SRR13397201	2	1	MRE11	MRE11- Pre-Induction Replicate 2	DM1159	chr2_pho5matindel	26	45.8411	0.927908	0.994991	717074	813416
SRR13397200	2	1	MRE11	MRE11- 15 Min Replicate 2	DM1160	chr2_pho5matindel	26	48.4665	0.949867	0.997495	758143	813416
SRR13397199	2	1	MRE11	MRE11- 30 Min Replicate 2	DM1161	chr2_pho5matindel	26	45.8338	0.91621	0.99714	716960	813416
SRR13397198	2	1	MRE11	MRE11- 60 Min Replicate 2	DM1162	chr2_pho5matindel	26	51.9616	0.948147	0.997773	812816	813416
SRR13397197	2	1	MRE11	MRE11- 90 Min Replicate	DM1163	chr2_pho5matindel	26	43.1465	0.954435	0.997688	674924	813416
SRR13397196	2	1	MRE11	MRE11- 120 Min Replicate	DM1164	chr2_pho5matindel	26	72.6134	0.897321	0.988245	1135863	813416
SRR13397195	1	1	NHEJ	WT NHEJ Pre-Induction Replicate 1	DM1291	chr2_pho5matindel	26	43.5552	0.96814	0.998482	681317	813416
SRR13397194	1	1	NHEJ	WT 1 h Gal Replicate 1	DM1292	chr2_pho5matindel	26	52.8995	0.955702	0.998802	827486	813416
SRR13397193	1	1	NHEJ	WT 1 h Dex Replicate 1	DM1293	chr2_pho5matindel	26	39.8225	0.965502	0.999431	622928	813416
SRR13397192	1	1	NHEJ	WT 2 h Dex Replicate 1	DM1294	chr2_pho5matindel	26	38.388	0.931857	0.997179	600488	813416
SRR13397190	1	1	NHEJ	WT 4 h Dex Replicate 1	DM1295	chr2_pho5matindel	26	45.4696	0.938557	0.993428	711264	813416
SRR13397189	1	1	NHEJ	WT 6 h Dex Replicate 1	DM1296	chr2_pho5matindel	26	43.7548	0.910277	0.983941	684439	813416
SRR13397188	2	1	NHEJ	WT NHEJ Pre-Induction Replicate 2	DM1297	chr2_pho5matindel	26	49.61	0.96814	0.998482	776030	813416
SRR13397187	2	1	NHEJ	WT 1 h Gal Replicate 2	DM1298	chr2_pho5matindel	26	45.6292	0.955702	0.998802	713760	813416
SRR13397186	2	1	NHEJ	WT 1 h Dex Replicate 2	DM1299	chr2_pho5matindel	26	32.5894	0.965502	0.999431	509784	813416
SRR13397185	2	1	NHEJ	WT 2 h Dex Replicate 2	DM1300	chr2_pho5matindel	26	65.8033	0.931857	0.997179	1029335	813416
SRR13397184	2	1	NHEJ	WT 4 h Dex Replicate 2	DM1301	chr2_pho5matindel	26	34.5922	0.938557	0.993428	541113	813416
SRR13397183	2	1	NHEJ	WT 6 h Dex Replicate 2	DM1302	chr2_pho5matindel	26	51.5549	0.910277	0.983941	806454	813416
SRR13397182	1	1	DNL4	DNL4- NHEJ Pre-Induction Replicate 1	DM1303	chr2_pho5matindel	26	47.547	0.952915	0.997363	743759	813416
SRR13397181	1	1	DNL4	DNL4- 1 h Gal Replicate 1	DM1304	chr2_pho5matindel	26	33.4711	0.919709	0.997242	523576	813416
SRR13397179	1	1	DNL4	DNL4- 1 h Dex Replicate 1	DM1305	chr2_pho5matindel	26	57.6798	0.94259	0.993205	902263	813416
SRR13397298	1	1	DNL4	DNL4- 2 h Dex Replicate 1	DM1306	chr2_pho5matindel	26	27.4472	0.880598	0.985208	429346	813416
SRR13397297	1	1	DNL4	DNL4- 4 h Dex Replicate 1	DM1307	chr2_pho5matindel	26	62.0003	0.912762	0.99671	969847	813416
SRR13397296	1	1	DNL4	DNL4- 6 h Dex Replicate 1	DM1308	chr2_pho5matindel	26	47.3206	0.956901	0.996291	740218	813416
SRR13397295	2	1	DNL4	DNL4- NHEJ Pre-Induction Replicate 2	DM1309	chr2_pho5matindel	26	49.0817	0.952915	0.997363	767766	813416
SRR13397294	2	1	DNL4	DNL4- 1 h Gal Replicate 2	DM1310	chr2_pho5matindel	26	52.6133	0.919709	0.997242	823009	813416
SRR13397293	2	1	DNL4	DNL4- 1 h Dex Replicate 2	DM1311	chr2_pho5matindel	26	51.9061	0.94259	0.993205	811947	813416
SRR13397292	2	1	DNL4	DNL4- 2 h Dex Replicate 2	DM1312	chr2_pho5matindel	26	47.0834	0.880598	0.985208	736507	813416
SRR13397291	2	1	DNL4	DNL4- 4 h Dex Replicate 2	DM1313	chr2_pho5matindel	26	47.6867	0.912762	0.99671	745944	813416
SRR13616441	2	1	DNL4	DNL4- 6 h Dex Replicate 2	DM1314	chr2_pho5matindel	26	46.367	0.956901	0.996291	725301	813416
SRR13397288	1	0	WT	WT Pre-Induction Replicate 1	DM1129	sacCer3	26	73.7936	0.969768	0.980432	17252240	12157105
SRR13397287	1	0	WT	WT 15 Min Replicate 1	DM1130	sacCer3	26	67.625	0.978179	0.975153	15810085	12157105
SRR13397286	1	0	WT	WT 30 Min Replicate 1	DM1131	sacCer3	26	67.0537	0.972457	0.979766	15676526	12157105
SRR13397285	1	0	WT	WT 60 Min Replicate 1	DM1132	sacCer3	26	69.9528	0.979377	0.934489	16354288	12157105
SRR13397284	1	0	WT	WT 90 Min Replicate 1	DM1133	sacCer3	26	59.2528	0.985493	0.995301	13852752	12157105
SRR13397283	1	0	WT	WT 120 Min Replicate 1	DM1134	sacCer3	26	70.1773	0.967561	0.889024	16406780	12157105
SRR13397282	1	0	YKU	YKU70- Pre-Induction Replicate 1	DM1135	sacCer3	26	77.0225	0.94728	0.786275	18007131	12157105
SRR13397281	1	0	YKU	YKU70- 15 Min Replicate 1	DM1136	sacCer3	26	57.4796	0.966205	0.835679	13438175	12157105
SRR13397280	1	0	YKU	YKU70- 30 Min Replicate 1	DM1137	sacCer3	26	63.6238	0.971209	0.927058	14874647	12157105
SRR13397279	1	0	YKU	YKU70- 60 Min Replicate 1	DM1138	sacCer3	26	54.8522	0.97188	0.825751	12823915	12157105
SRR13397277	1	0	YKU	YKU70- 90 Min Replicate 1	DM1139	sacCer3	26	53.9561	0.970744	0.815977	12614430	12157105
SRR13397276	1	0	YKU	YKU70- 120 Min Replicate 1	DM1140	sacCer3	26	54.1772	0.966502	0.877245	12666107	12157105
SRR13397275	1	0	MRE11	MRE11- Pre-Induction Replicate 1	DM1141	sacCer3	26	52.5404	0.973966	0.958537	12283444	12157105
SRR13397274	1	0	MRE11	MRE11- 15 Min Replicate 1	DM1142	sacCer3	26	50.2999	0.982545	0.965458	11759643	12157105
SRR13397273	1	0	MRE11	MRE11- 30 Min Replicate 1	DM1143	sacCer3	26	59.5649	0.976543	0.966458	13925700	12157105
SRR13397272	1	0	MRE11	MRE11- 60 Min Replicate 1	DM1144	sacCer3	26	55.1934	0.980716	0.960164	12903694	12157105
SRR13397271	1	0	MRE11	MRE11- 90 Min Replicate 1	DM1145	sacCer3	26	51.316	0.980606	0.932441	11997197	12157105
SRR13397270	1	0	MRE11	MRE11- 120 Min Replicate 1	DM1146	sacCer3	26	33.0791	0.966051	0.875171	7733584	12157105
SRR13397269	2	0	WT	WT Pre-Induction Replicate 2	DM1147	sacCer3	26	42.8355	0.969768	0.980432	10014539	12157105
SRR13397268	2	0	WT	WT 15 Min Replicate 2	DM1148	sacCer3	26	45.8905	0.978179	0.975153	10728768	12157105
SRR13397266	2	0	WT	WT 30 Min Replicate 2	DM1149	sacCer3	26	39.0936	0.972457	0.979766	9139702	12157105
SRR13397265	2	0	WT	WT 60 Min Replicate 2	DM1150	sacCer3	26	55.8773	0.979377	0.934489	13063586	12157105
SRR13397264	2	0	WT	WT 90 Min Replicate	DM1151	sacCer3	26	45.8761	0.985493	0.995301	10725386	12157105
SRR13397263	2	0	WT	WT 120 Min Replicate	DM1152	sacCer3	26	53.1415	0.967561	0.889024	12423976	12157105
SRR13397262	2	0	YKU	YKU70- Pre-Induction Replicate 2	DM1153	sacCer3	26	42.6118	0.94728	0.786275	9962224	12157105
SRR13397261	2	0	YKU	YKU70- 15 Min Replicate 2	DM1154	sacCer3	26	43.2644	0.966205	0.835679	10114807	12157105
SRR13397260	2	0	YKU	YKU70- 30 Min Replicate 2	DM1155	sacCer3	26	44.1834	0.971209	0.927058	10329667	12157105
SRR13397259	2	0	YKU	YKU70- 60 Min Replicate 2	DM1156	sacCer3	26	50.9816	0.97188	0.825751	11919024	12157105
SRR13397258	2	0	YKU	YKU70- 90 Min Replicate	DM1157	sacCer3	26	40.9715	0.970744	0.815977	9578757	12157105
SRR13397257	2	0	YKU	YKU70- 120 Min Replicate	DM1158	sacCer3	26	38.8119	0.966502	0.877245	9073863	12157105
SRR13397255	2	0	MRE11	MRE11- Pre-Induction Replicate 2	DM1159	sacCer3	26	37.9	0.973966	0.958537	8860658	12157105
SRR13397254	2	0	MRE11	MRE11- 15 Min Replicate 2	DM1160	sacCer3	26	39.0836	0.982545	0.965458	9137366	12157105
SRR13397253	2	0	MRE11	MRE11- 30 Min Replicate 2	DM1161	sacCer3	26	36.9478	0.976543	0.966458	8638048	12157105
SRR13397252	2	0	MRE11	MRE11- 60 Min Replicate 2	DM1162	sacCer3	26	41.7698	0.980716	0.960164	9765379	12157105
SRR13397251	2	0	MRE11	MRE11- 90 Min Replicate	DM1163	sacCer3	26	34.6974	0.980606	0.932441	8111925	12157105
SRR13397250	2	0	MRE11	MRE11- 120 Min Replicate	DM1164	sacCer3	26	56.7855	0.966051	0.875171	13275900	12157105
SRR13397249	1	0	NHEJ	WT NHEJ Pre-Induction Replicate 1	DM1291	sacCer3	26	33.6013	0.985645	0.945732	7855669	12157105
SRR13397248	1	0	NHEJ	WT 1 h Gal Replicate 1	DM1292	sacCer3	26	41.4733	0.984652	0.965053	9696061	12157105
SRR13397247	1	0	NHEJ	WT 1 h Dex Replicate 1	DM1293	sacCer3	26	31.6919	0.984177	0.997004	7409256	12157105
SRR13397246	1	0	NHEJ	WT 2 h Dex Replicate 1	DM1294	sacCer3	26	32.1317	0.975327	0.988811	7512088	12157105
SRR13397242	1	0	NHEJ	WT 4 h Dex Replicate 1	DM1295	sacCer3	26	35.6256	0.974344	0.940416	8328922	12157105
SRR13397241	1	0	NHEJ	WT 6 h Dex Replicate 1	DM1296	sacCer3	26	34.1388	0.974331	0.886568	7981320	12157105
SRR13397240	2	0	NHEJ	WT NHEJ Pre-Induction Replicate 2	DM1297	sacCer3	26	40.0458	0.985645	0.945732	9362332	12157105
SRR13397239	2	0	NHEJ	WT 1 h Gal Replicate 2	DM1298	sacCer3	26	37.3299	0.984652	0.965053	8727368	12157105
SRR13397238	2	0	NHEJ	WT 1 h Dex Replicate 2	DM1299	sacCer3	26	26.0553	0.984177	0.997004	6091482	12157105
SRR13397237	2	0	NHEJ	WT 2 h Dex Replicate 2	DM1300	sacCer3	26	53.4189	0.975327	0.988811	12488823	12157105
SRR13397236	2	0	NHEJ	WT 4 h Dex Replicate 2	DM1301	sacCer3	26	28.9829	0.974344	0.940416	6775935	12157105
SRR13397235	2	0	NHEJ	WT 6 h Dex Replicate 2	DM1302	sacCer3	26	38.8339	0.974331	0.886568	9079003	12157105
SRR13397234	1	0	DNL4	DNL4- NHEJ Pre-Induction Replicate 1	DM1303	sacCer3	26	37.9658	0.982536	0.982831	8876031	12157105
SRR13397233	1	0	DNL4	DNL4- 1 h Gal Replicate 1	DM1304	sacCer3	26	27.4681	0.974099	0.990793	6421775	12157105
SRR13397231	1	0	DNL4	DNL4- 1 h Dex Replicate 1	DM1305	sacCer3	26	47.4846	0.980095	0.972849	11101442	12157105
SRR13397230	1	0	DNL4	DNL4- 2 h Dex Replicate 1	DM1306	sacCer3	26	24.706	0.937172	0.972899	5776029	12157105
SRR13397229	1	0	DNL4	DNL4- 4 h Dex Replicate 1	DM1307	sacCer3	26	46.775	0.973386	0.949434	10935555	12157105
SRR13397228	1	0	DNL4	DNL4- 6 h Dex Replicate 1	DM1308	sacCer3	26	37.1752	0.978201	0.926126	8691212	12157105
SRR13397227	2	0	DNL4	DNL4- NHEJ Pre-Induction Replicate 2	DM1309	sacCer3	26	37.8642	0.982536	0.982831	8852292	12157105
SRR13397226	2	0	DNL4	DNL4- 1 h Gal Replicate 2	DM1310	sacCer3	26	41.3052	0.974099	0.990793	9656773	12157105
SRR13397225	2	0	DNL4	DNL4- 1 h Dex Replicate 2	DM1311	sacCer3	26	41.4674	0.980095	0.972849	9694677	12157105
SRR13397224	2	0	DNL4	DNL4- 2 h Dex Replicate 2	DM1312	sacCer3	26	37.6538	0.937172	0.972899	8803109	12157105
SRR13397223	2	0	DNL4	DNL4- 4 h Dex Replicate 2	DM1313	sacCer3	26	39.0045	0.973386	0.949434	9118886	12157105
SRR13397222	2	0	DNL4	DNL4- 6 h Dex Replicate 2	DM1314	sacCer3	26	41.0224	0.978201	0.926126	9590658	12157105

## Sheet: README
Summary of sequencing statistcs and correlation (based on entropy or read-depth) for each experiment and replicate.
